# Supplementary material for: Phylogeny of the Chinese Subgenera of the Genus Homoneura (Diptera, Lauxaniidae, Homoneurinae) Based on Morphological Characters
Source: MDPI journal article supplement (doi:10.3390/insects13080665), 2022-07-22
Supplement: s1 [file s1]

Table S1. The species studied

| subfamily    | Genus                  | Subgenus               | Species                                                                       |
|--------------|------------------------|------------------------|-------------------------------------------------------------------------------|
| Lauxaniinae  | <i>Minettia</i>        | <i>Frendelia</i>       | <i>Minettia (Frendelia) longipennis</i> (Fabricius, 1794)                     |
| Lauxaniinae  | <i>Pachycerina</i>     |                        | <i>Pachycerina decemlineata</i> de Meijere, 1914                              |
| Homoneurinae | <i>Cestrotus</i>       |                        | <i>Cestrotus liui</i> Shi, Yang <i>et</i> Gaimari, 2009                       |
| Homoneurinae | <i>Dioides</i>         |                        | <i>Dioides incurvatus</i> Shi, Li <i>et</i> Yang, 2009                        |
| Homoneurinae | <i>Phobeticomyia</i>   |                        | <i>Phobeticomyia motuoensis</i> Li, Qi <i>et</i> Yang, 2020                   |
| Homoneurinae | <i>Prosopophorella</i> |                        | <i>Prosopophorella yoshiyasui</i> Sasakawa, 2001                              |
| Homoneurinae | <i>Noonamyia</i>       |                        | <i>Noonamyia umbrellata</i> Shi <i>et</i> Yang, 2009                          |
| Homoneurinae | <i>Homoneura</i>       | <i>Chaetohomoneura</i> | <i>Homoneura (Chaetohomoneura) disciformis</i> Shi, Wang <i>et</i> Yang, 2011 |
|              |                        | <i>Euhomoneura</i>     | <i>Homoneura (Euhomoneura) shataikini</i> Papp, 1984                          |
|              |                        |                        | <i>Homoneura (Euhomoneura) yanqingensis</i> Shi, Gao <i>et</i> Li, 2017       |
|              |                        | <i>Homoneura</i>       | <i>Homoneura (Homoneura) beckeri</i> (Kertész, 1900)                          |
|              |                        |                        | <i>Homoneura (Homoneura) flavida</i> Shi <i>et</i> Yang, 2009                 |
|              |                        |                        | <i>Homoneura (Homoneura) dorsacerba</i> Gao, Shi <i>et</i> Han, 2016          |
|              |                        |                        | <i>Homoneura (Homoneura) posterotricuspis</i> Gao, Shi <i>et</i> Han, 2016    |
|              |                        |                        | <i>Homoneura (Homoneura) acrostichalis</i> (de Meijere, 1915)                 |
|              |                        |                        | <i>Homoneura (Homoneura) crassicauda</i> Malloch, 1927                        |
|              |                        |                        | <i>Homoneura (Homoneura) picta</i> (de Meijere, 1904)                         |
|              |                        |                        | <i>Homoneura (Homoneura) procerula</i> Gao <i>et</i> Yang, 2005               |
|              |                        |                        | <i>Homoneura (Homoneura) noticomata</i> Shi <i>et</i> Yang, 2014              |
|              |                        |                        | <i>Homoneura (Homoneura) trispina</i> Malloch, 1927                           |
|              |                        | <i>Minettioides</i>    | <i>Homoneura (Minettioides) orientis</i> (Hendel, 1908)                       |
|              |                        | <i>Neohomoneura</i>    | <i>Homoneura (Neohomoneura) nigrimarginata</i> Shi, Wang <i>et</i> Yang, 2011 |
|              |                        |                        | <i>Homoneura (Neohomoneura) tricuspidata</i> Shi <i>et</i> Yang, 2008         |
|              |                        |                        | <i>Homoneura (Neohomoneura) zengae</i> Shi <i>et</i> Yang, 2008               |

Table S2. Morphological dataset used for the analysis of the phylogeny.

| Taxon                                          | Characters                                                                                                    |
|------------------------------------------------|---------------------------------------------------------------------------------------------------------------|
| <i>Minettia (Frendelia) longipennis</i>        | 00000000000000000000000000000000000000000000000000000<br>0000000000000000000000000000000000000000000000000    |
| <i>Pachycerina decemlineata</i>                | 0101101001011100001000001120101001001100010010000000000000000<br>110000000111000000101-----1---101000000100   |
| <i>Cestrotus liui</i>                          | 110001002001110111110101101010001100110121000000112300211011001<br>100000002010011010101110011---000011101100 |
| <i>Dioides incurvatus</i>                      | 110000002001110110101001111010000100110121000110112310211011001<br>110001001000110000100110011---010110100111 |
| <i>Phobeticomyia motuoensis</i>                | 010000101001110010110001110010000100100021001010112310211011001<br>110000001010011111001000010010110110100100 |
| <i>Prosopophorella yoshiyasui</i>              | 110002002001001110111011011000000100111121001001112310211011001<br>100000002110110110100000010110000011100100 |
| <i>Noonamyia umbrellata</i>                    | 010000101001000000101100112000001101110111000010112300211110111<br>100000001000010000100001010011000011110100 |
| <i>Homoneura (Chaetohomoneura) disciformis</i> | 01000000101100000000000111101100000010002011201000000000000100<br>1000000020000111001102010101001101110?????  |
| <i>Homoneura (Euhomoneura) shatalkini</i>      | 011000101001000000000011111010012100100121000010001211100001000<br>110000000001010100110110010100000100100110 |
| <i>Homoneura (Euhomoneura) yanqingensis</i>    | 011000001001000000000011112010012110100021000010001111100001001<br>110000002000010100001000010100000110100110 |
| <i>Homoneura (Homoneura) beckeri</i>           | 010000010201100100010100111101000000100121001010000001000000000<br>111111101000110100110301110100010111100110 |
| <i>Homoneura (Homoneura) flavida</i>           | 010000010201000100000001111101000000100121001010000001000000000                                               |

|                                                |                                                                                                                                                             |
|------------------------------------------------|-------------------------------------------------------------------------------------------------------------------------------------------------------------|
| <i>Homoneura (Homoneura) dorsacerba</i>        | 111110102000110100101301010100010111100100<br>011000001001000100000011011010000100100121000010112311100001000<br>111111111011010111011201010100000110100100 |
| <i>Homoneura (Homoneura) posterotricuspis</i>  | 011000001001000100000011011010000100100121000010112311100001000<br>111111112011011111011201010100010110100100                                               |
| <i>Homoneura (Homoneura) acrostichalis</i>     | 011100001001000100000011111011000010100121000010000000000000101<br>1100020001100101000000110100001000101?????                                               |
| <i>Homoneura (Homoneura) crassicauda</i>       | 011100001001000100000011111011000100100121000010000000000000100<br>1100020001000100011002111100000101001?????                                               |
| <i>Homoneura (Homoneura) picta</i>             | 010000001101100100000101011010100100100111001010112311211011100<br>111111111000010100010201110100000011100100                                               |
| <i>Homoneura (Homoneura) procerula</i>         | 010000001101000100000101011010100100100111001010112311211011100<br>111111110010110101001201110100010000100100                                               |
| <i>Homoneura (Homoneura) noticomata</i>        | 000100001000000100010000110001000000100111000010000000000000100<br>000000001010111111001110010100000000100100                                               |
| <i>Homoneura (Homoneura) trispina</i>          | 000000001010000100010001110001000000100121001010000000000000100<br>000000002000011000100110110100010101100100                                               |
| <i>Homoneura (Minettioides) orientis</i>       | 011100001001000000000100111011000000000111000010000000000000110<br>110002000001110101001201000000011111102100                                               |
| <i>Homoneura (Neohomoneura) nigrimarginata</i> | 011000001001000000000101111011000000100021011010001101200000100<br>1100000020111101001002010101011101111?????                                               |
| <i>Homoneura (Neohomoneura) tricuspidata</i>   | 011000001001000000000000111011000000100021011010001101200000100<br>110010102011010100100101010100100111100100                                               |
| <i>Homoneura (Neohomoneura) zengae</i>         | 011000001001000000000001111011000000100021011010001101200000100<br>110000002011010010100201010100100111100100                                               |
